1  
2  
3  
4  
5  
6  
7  
8  
9  
10  
11  
12  
13  
14  
15  
16  
17  
18  
19  
20  
21  
22  
23  
24  
25  
26  
27  
28  
29  
30  
31  
32

# Using connectivity to identify climatic drivers of local adaptation

Stewart L. Macdonald<sup>\*1,2</sup>, John Llewelyn<sup>1,2</sup>, & Ben L. Phillips<sup>3,1</sup>

1. Centre for Tropical Biodiversity and Climate Change, James Cook University, Townsville, Qld, 4811, Australia. [stewart.macdonald@my.jcu.edu.au](mailto:stewart.macdonald@my.jcu.edu.au)
  2. CSIRO Land and Water Flagship, Townsville, Qld, Australia
  3. School of Biosciences, University of Melbourne, Vic, Australia. [phillipsb@unimelb.edu.au](mailto:phillipsb@unimelb.edu.au)
- \* Author and address for correspondence

Running title: Identifying drivers of local adaptation

Statement of authorship: BLP and SLM designed research; SLM, JL, and BLP collected data; SLM & BLP performed analyses and wrote the manuscript; all authors contributed to revisions.

Keywords: local adaptation, climate, connectivity, gene flow.

## Abstract

Despite being able to conclusively demonstrate local adaptation, we are still often unable to objectively determine the climatic drivers of local adaptation. Given the rapid rate of global change, understanding the climatic drivers of local adaptation is vital. Not only will this tell us which climate axes matter most to population fitness, but such knowledge is critical to inform management strategies such as translocation and targeted gene flow. Targeted gene flow, for example, requires knowledge of where in the landscape we can find populations with pre-adapted climate-relevant traits; we cannot find these populations if we do not know the dominant climatic drivers of local adaptation. While simple assessments of geographic trait variation are useful, geographic variation — and its associations with environment — may represent plastic, rather than evolved differences. Additionally, the vast number of environment–trait combinations makes it difficult to determine which aspects of the environment populations adapt to. Here we argue that by incorporating a measure of landscape connectivity as a proxy for gene flow, we can differentiate between environment–trait relationships that are under selection versus those that reflect phenotypic plasticity. By doing so, we can rapidly shorten the list of environment–trait combinations that may be of adaptive significance. We demonstrate this method using data on geographic trait variation in a lizard species from Australia’s Wet Tropics rainforest.

## 54 **Significance Statement**

55 Despite 150 years of evolutionary research, we still do not have a good method for  
 56 determining the climatic drivers of local adaptation. Having such a method is critical  
 57 if we are to understand and mitigate the impact of climate change. Here we exploit the  
 58 fact that local adaptation is eroded by gene flow to develop a new method for  
 59 identifying the environmental drivers of local adaptation. Our method will allow  
 60 workers around the world, for the first time (and often using existing datasets), to  
 61 determine the climatic drivers of local adaptation in their system. As such, the method  
 62 has powerful implications not only for pure evolutionary research, but also for  
 63 management.

64

## Introduction

It is only recently that we have begun to appreciate the speed with which evolution can happen; not only over relatively short timespans (e.g., 1, 2-4), but also at small spatial scales (5). Rapid local adaptation has been recorded in response to a wide suite of environmental drivers, including invasive species, and pollution (6). We expect climate to also be a major driver of local adaptation (e.g., 7, 8), and understanding the way in which species respond to climate is of increasing importance because anthropogenic climate change is proceeding at such a rate that there are concerns that many species will be unable to evolve rapidly enough to avoid extinction (9, 10).

Evolution typically optimizes phenotypes, but the optimum will vary through both time and space (11, 12), in turn leading to populations ('demes') that have, on average, higher fitness in their home environment than an immigrant would: local adaptation. While adaptive optima for traits almost always vary geographically, it does not follow that all geographic trait variation is due to local adaptation. Geographic trait variation can arise due to other factors, such as phenotypic plasticity (including developmental plasticity and maternal effects) and environmental factors (such as geographic variation in fitness-reducing parasites). These factors, and particularly phenotypic plasticity, can give the appearance of local adaptation, despite having no underlying heritable basis (10, 11), complicating our identification of climate-relevant adaptive variation.

To circumvent these issues, evolutionary biologists use experimental approaches to demonstrate local adaptation (12, 13). Experiments designed to detect local adaptation typically utilise one of two techniques: 1) reciprocal transplants, which are done *in*

90 *situ*, and are considered the gold standard for demonstrating local adaptation; or 2)  
 91 common garden experiments, which are usually done in the lab where it is easier to  
 92 control each environmental variable (12). Both of these techniques can be difficult,  
 93 for reasons of time, expense, logistics, or ethics. This difficulty increases as the  
 94 number of separate demes and environmental variables to be tested increases and as  
 95 the generation time of the organism increases (12). Additionally, although reciprocal  
 96 transplants will detect signs of local adaptation, they are not necessarily suited to  
 97 identifying the environmental drivers of that local adaptation (14). This is because *in*  
 98 *situ* reciprocal transplants necessarily encompass all the environmental variables that  
 99 differ between the transplant locations. Lab-based common garden approaches may,  
 100 in principle, be more suited to identifying environmental drivers (because the  
 101 environment may be under a degree of control), but in practice it often remains  
 102 impossible to identify the environmental drivers of trait variation seen in the wild.  
 103 Thus, the best experimental tools we have for studying local adaptation are  
 104 demanding in terms of time and cost, and are unsuitable for assigning environmental  
 105 drivers (such as climate variables) to adaptive variation. If we are looking for climate-  
 106 driven local adaptation, this is a problem: we want to know which climate variable or  
 107 variables are the main drivers of adaptation, and we urgently need this information for  
 108 many species.

109

110 By definition, local adaptation has a genetic basis and is consequently weakened by  
 111 gene flow (11, 15, 16). Demes with high levels of inward gene flow are therefore  
 112 likely to be less optimally adapted, causing an observable mismatch between optimal  
 113 and actual phenotypes. Some examples of this are birds dispersing and producing  
 114 clutch sizes that are not optimised for the habitat quality in which they are now

nesting (17), larval salamander colouration not matching streambed colouration due to high levels of gene flow from nearby but predator-free streams (18), and stick insects in smaller habitat patches having non-cryptic colouration when the surrounding patches are larger and environmentally dissimilar (19). These observations of "migrant load" suggest an alternative technique for identifying and assessing local adaptation. First, we look across populations for correlations between the environment (e.g., mean annual temperature) and traits (e.g., morphology, physiology). By themselves, these correlations are not sufficient evidence of local adaptation — they could also be caused by phenotypic plasticity. Second, knowing that local adaptation is hindered by gene flow, we can look at whether gene flow diminishes the environmental effect. In cases where data on gene flow are absent (which is often the case), habitat connectivity can be used as a substitute for gene flow. Environment–trait correlations that are strong, but which are also weakened by connectivity, are indicative of environment–trait correlations that have arisen through local adaptation.

If we now collect data on a large number of environment–trait correlations, and their interaction with connectivity, we can imagine several possible patterns emerging. These possibilities are depicted in Figure 1. Each panel represents a possible relationship between environment–trait correlations (environmental coefficients on the x-axis) and the interaction between environment and connectivity (y-axis). Panel A shows a set of environment–trait relationships that are strong, but that are not influenced by connectivity (i.e., no environment–connectivity interaction). This pattern is indicative of a system in which environment–trait correlations are predominantly driven by plastic responses of traits to their environment (i.e., traits always match the local environment, regardless of the level of inward gene flow).

Plastic responses are still of interest, and many species are likely to show such plasticity as the climate changes (20). Panel B shows a system in which environment–trait relationships are eroded by connectivity: increased connectivity diminishes the correlation between the environment and the trait. In this situation, the interaction between the environmental variable and connectivity is negative when the environmental coefficient is positive (i.e., greater connectivity causes the environmental coefficient to decrease towards zero; bottom-right quadrant), and positive when the environmental coefficient is negative (i.e., greater connectivity causes the environmental coefficient to increase towards zero; top-left quadrant). This is the pattern we would expect if there is a genetic basis to the environment–trait correlation, i.e., local adaptation. Panel C shows the situation where the effect of the environment tends to be enhanced by connectivity. This pattern might arise in organisms that are highly mobile and can actively move to their ideal environment, thus avoiding the selective pressures that would lead to local adaptation.

Understanding how species respond to specific aspects of their environment is vital if we are to have any hope of halting the current rapid loss of biodiversity. Climate change is undoubtedly one of the biggest threats to global biodiversity (21, 22), and conservation biologists are looking to a variety of techniques to assess and help mitigate the impacts of climate change on vulnerable species (23–25). One technique that is likely to see increasing use is targeted, or assisted gene flow [TGF; for review, see (23, 26)]. This technique involves the spatial redistribution of long-standing adaptations, and acts to increase genetic diversity in recipient populations, thereby bolstering capacity for evolutionary adaptation (10, 23, 25, 26). When applying TGF to help species adapt to climate change, we need to find an existing location that

matches the future climate at our recipient site, and then translocate animals from that source location. It is a simple idea, but climate is multidimensional and species will not be adapting equally to each climate axis: is a difference of 0.5°C in mean temperature more important than a difference of 100mm in annual rainfall? The answer depends upon which axes have the strongest influence on fitness.

Here we explore the idea of using connectivity to infer local adaptation. To do this we develop a case study of a lizard species from northern Australia. We use this system to examine the relationship, across sites, between traits and climatic variables. We assess how habitat connectivity affects these relationships and use the interaction between the environmental variable and connectivity to rank environment–trait combinations. In doing so, we reveal a set of environment–trait relationships dominated by local adaptation.

## **Methods**

### Study species and site selection

The Rainforest Sunskink (*Lampropholis coggeri*) is a small (snout–vent length up to 45 mm), diurnal scincid lizard restricted to the rainforests of the Wet Tropics region of northeastern Australia (27). The rainforests of this region cover a wide range of environmental conditions, spanning significant elevation (0–1600 m ASL), precipitation (annual mean precipitation of 1432–8934 mm, not including input from cloud stripping), and temperature (annual mean temperature of 16.3–25.8°C) gradients. This heliothermic skink is active year-round, often seen basking in patches



of sunlight on the rainforest floor. Lizards were captured by hand from sites that were selected to maximize the environmental heterogeneity sampled (Fig. 2).

Morphological measurements were obtained from 532 skinks from 32 sites. Physiological measurements were obtained from a smaller subset of these lizards: 259 skinks from 12 sites. Between 8–20 skinks were caught at each site on each collecting trip. Following capture, skinks were transported to James Cook University (JCU) in Townsville for trait measurement. All procedures involving lizards were approved by the JCU animal ethics committee (projects A1976 and A1726).

#### Physiological trials

Physiological trials commenced within seven days of skinks being collected from the field; skinks being used only for morphology were measured and released back at their point of capture within seven days. The following measures were taken from each skink ( $n = 259$ ) during laboratory trials: critical thermal minimum (CT<sub>min</sub>), critical thermal maximum (CT<sub>max</sub>), thermal-performance breadth for sprinting (breadth<sub>80</sub>), maximum sprint speed (R<sub>max</sub>), temperature at which sprint speed is optimized (T<sub>opt</sub>), active body temperature as measured in a thermal gradient (T<sub>active</sub>), and desiccation rate (des) (see Table S1 for further details). Details of trait measurement procedures are detailed elsewhere (see 28, 29).

## Morphological measurements

The following measurements were taken from each skink ( $n = 532$ ) using digital calipers: head width (HeadW); head length (HeadL); interlimb length (ILimbL); hindlimb length (HindLL). Left and right measurements were averaged to obtain one measurement for that trait. We also recorded snout–vent length (SVL), total length, and mass (see Table S1 for further details). All measurements were taken by one person (SLM) to minimize observer bias. All morphological variables were log-transformed prior to regression analyses.

## Climatic variables, and connectivity

As our study aimed to assess adaptation to local climate, various temperature and precipitation variables were extracted for each site (see Table S2 for details). We considered both means and extremes. It is important to consider climatic extremes, because temperature extremes may be increasing faster than mean temperatures (30), and many species are likely to be particularly vulnerable to these extremes (31). Many environmental variables are highly correlated (28), so only the less-derived variables were used in analyses, specifically: annual mean precipitation (AMP); seasonality of precipitation (Pcov); precipitation of the driest quarter (Pdry); annual mean temperature (AMT); coefficient of variation of temperature (Tcov); average minimum daily temperature (Tmin); average maximum daily temperature (Tmax); average variance of daily maximum temperature (TmaxVar); and average variance of daily Tmin (TminVar).

Our connectivity index was designed to capture the flux of individuals through a location and is detailed in the Supplementary Material. Briefly, it is a measure of habitat suitability for our focal skink species, averaged over space using a species-specific estimate of dispersal potential. As our species is an obligate rainforest-dweller, grid cells in the landscape that are rainforest and that are surrounded by rainforest have high connectivity indices, while grid cells of rainforest surrounded by non-rainforest matrix have low indices. See Table S2 for further details on all variables, and Figure S1 for correlations between all variables.

### Analysis

Our analysis aimed to assess: 1) the relationship, across sites, between each trait and each environmental variable; and 2) how connectivity affected each of these relationships (i.e., the interaction between connectivity and environment). To allow comparison of coefficients across variables, and to make interaction effect-sizes meaningful, all trait and environmental variables were standardized so they had a mean of 0 and a standard deviation of 1. Linear models were fitted for each pair of environment–trait variables, with all models including the effect of lizard body size and sex, as well as the interaction between environment and connectivity:

$$\text{trait}_i = A + B_{svl} \times \text{SVL}_i + B_{sex} \times \text{Sex}_i + B_{env} \times \text{Env} + B_{conn} \times \text{Conn} + B_{int} \times \text{Env} \times \text{Conn} + \text{error}_i$$

Where:

trait<sub>i</sub> = standardized trait value of interest for lizard *i*

A = intercept

$B_{svl}$  = coefficient of SVL

SVL = lizard snout–vent length, to control for effect of body size

$B_{sex}$  = coefficient of Sex

259 Sex = lizard sex (this species is sexually dimorphic in some morphological  
 260 traits)  
 261  $B_{env}$  = coefficient of environmental variable  
 262 Env = environmental variable (e.g., annual mean temperature) at the lizard's  
 263 site  
 264  $B_{conn}$  = coefficient of connectivity  
 265 Conn = connectivity index at the lizard's site  
 266  $B_{int}$  = coefficient of interaction between Env and Conn  
 267  $error_i$  = deviation between expected value and trait value of lizard  $i$   
 268

A score for ranking the strength of local adaptation was then calculated as:

$$L = -B_{env} B_{int}$$

If the signs of the two coefficients ( $B_{env}$  and  $B_{int}$ ) are opposite (which indicates an environmental effect being eroded by high connectivity, i.e., evidence for local adaptation),  $L$  will be positive. If the signs are the same (which indicates an environmental effect being enhanced by high connectivity, a situation not consistent with local adaptation),  $L$  will be negative. Thus, higher numbers on this scale equate to stronger evidence for local adaptation in that environment–trait pair. This score can, in theory, range from  $-\infty$  to  $+\infty$ . Once many environment–trait combinations have been assessed, the coefficients for all pairs can be plotted (see Fig. 1). As described in the Introduction, in a system dominated by local adaptation, we expect to see a negative relationship between  $B_{env}$  and  $B_{int}$  (Fig. 1B). All analyses were conducted in R v3.2 (32).

## Results

There was substantial variation in the effect of environment ( $B_{env}$ ) and its interaction with connectivity ( $B_{int}$ ) across climate and trait variables, with  $B_{env}$  ranging from -1.64 to 1.37, and  $B_{int}$  ranging from -0.89 to 0.74 (Fig. 3). Despite this variation, a clear pattern is evident, with most points in Figure 3 appearing in the top-left or bottom-right quadrants: the quadrants in which the two coefficients have opposing signs, and where we would expect points to fall if environment–trait relationships are due to local adaptation. Across these environment–trait combinations there is a distinct negative linear trend (slope= -0.36,  $p < 0.001$ ). It is especially noteworthy that the environment–trait pairs with the largest coefficients (i.e., those points furthest away from the origin) are in the two quadrants indicative of local adaptation.

294  
 295 Overall, physiological traits showed substantially stronger environmental effects (i.e.,  
 296 larger values of  $B_{env}$ ) than did morphological traits, with the largest environmental  
 297 effects being exhibited by CTmin (AMP: -1.64; Tmax: 1.31; Pdry: 1.28) and CTmax  
 298 (Pdry: 1.37). Physiological traits also showed stronger interactions between  
 299 environmental effects and connectivity, again with CTmin and CTmax showing the  
 300 largest interactions. These trends are apparent when we examine our index of local  
 301 adaptation,  $L$ . Figure 4 shows a heatmap of all environment–trait pairs, ranked via  
 302 reciprocal averaging according to the strength of their local adaptation index. The  
 303 environment–trait pairs that show the strongest signature of local adaptation appear at  
 304 the top-left in red. There is a rough divide, with most of the physiological traits on the  
 305 left and most of the morphological traits on the right. The exceptions are the  
 306 physiological traits T<sub>opt</sub> and R<sub>max</sub>, which appear at the far right of the figure.  
 307

308 The two environmental variables that produced the strongest effects (topmost rows in  
 309 Fig 4) were both precipitation related: annual mean precipitation (AMP) and  
 310 precipitation of the driest quarter (Pdry). In our system, AMP and Pdry are both  
 311 highly correlated with connectivity (see Fig. S1). This is expected, because our  
 312 connectivity index is largely a measure of where rainforest is, and the distribution of  
 313 rainforest in our study region is driven to a large degree by rainfall.

314

315

## 316 Discussion

317 Understanding environment–trait correlations will help us plan management  
 318 strategies, such as targeted gene flow (TGF), that can mitigate the impact of climate  
 319 change on vulnerable species. Numerous studies have looked for (and found)

environment–trait correlations (e.g., 18, 19, 33, 34–36), but the interpretation of these associations is plagued with uncertainty: are they associations due to local adaptation, or plasticity? By acknowledging that gene flow undermines adaptation, we can incorporate connectivity (a proxy for the flux of genes) into our analysis, and in doing so, separate correlations due to local adaptation from those due to plasticity.

### Local adaptation

In the environment–trait combinations we assessed, physiological traits typically showed a substantially stronger effect of environment than did morphological traits, with the largest environmental effects shown in CT<sub>max</sub> and CT<sub>min</sub> (Figs. 3 & 4). Physiological traits also generally showed stronger environment–connectivity interactions, again with CT<sub>min</sub> and CT<sub>max</sub> showing the largest interactions. Overall, physiological traits generally showed stronger evidence of local adaptation than did morphological traits. This result is intuitive: we would expect an ectotherm’s physiological traits to be under strong selection from climate (37–39), but the fitness link between morphology and climate is much less clear. Had we also included some environmental variables that had a clearer bearing on morphology, we might have detected stronger environment–trait relationships for morphology. For example, skinks that occur in rockier habitats show various morphological adaptations to that environment (40). Including a measure of rockiness in our set of environmental variables, for example, might have allowed us to detect environmental correlations with limb length.

Of the environmental variables used, our analysis suggests that precipitation is a very strong driver of local adaptation, even in thermal traits that might not seem obviously

related to precipitation (e.g., CTmin, CTmax). Although this may seem a surprising result, precipitation has been shown to directly affect growth rate, body temperature, activity patterns, and thermoregulatory opportunities in lizards (38, 41-45). Wetter areas also have higher thermal inertia (and so lower cyclical thermal fluctuations (46)), and changed environmental variance in temperature potentially has a strong influence on thermal limits (47). Additionally, Bonebrake and Mastrandrea (48) found that changes in precipitation can significantly affect modeled fitness and performance curves. Finally, comparative analyses also suggest that precipitation can influence thermal traits in many species (38). Thus, although the mechanisms linking precipitation to thermal limits are diffuse and poorly resolved, they do exist, and our analyses suggest that precipitation is a strong driver of local adaptation at thermal physiological traits.

Our analysis also suggests that temperature is an important driver of local adaptation in this system, but that extremes of temperature (encapsulated in minimum and maximum temperatures) are at least as strongly associated with local adaptation as is mean temperature. Again, this result is intuitive (natural selection from climate is likely stronger during extreme events than during normal daily temperatures) and agrees with results of empirical studies (38). Finally, the environmental variables with the weakest signals of local adaptation are Tcov (temperature seasonality), TminVar, and TmaxVar (variance of minimum and maximum daily temperatures, respectively). These variables represent predictable environmental variation occurring within an individual's lifespan and so are variables to which we might expect individuals to develop plastic responses, rather than adaptive responses (49-51).



### System-wide signal of local adaptation

The clear negative linear trend displayed in Fig. 3 is precisely what we would expect in a set of environment–trait combinations dominated by local adaptation. Migrant load (the negative effect of the immigration of less-locally adapted individuals) scales positively with immigration as well as with the strength of selection [see equation 5 in Polechová, Barton and Marion (52)]. The reason for this is that, when the strength of selection is moderately high, the environment will have a large effect on relevant traits, and therefore any immigrants coming from differing environments will be particularly maladapted and will therefore have a large and negative impact on the local phenotype. Thus, we expect environment–trait combinations with strong local adaptation to show strong effects of connectivity on the environment–trait correlation (52).

We used long-term climatic averages and found strong evidence that local adaptation dominates over plasticity in our system. If we had included different environmental variables, such as the conditions the lizards had recently encountered, signals of plasticity may have been more apparent. Clearly environmental variables that are similar across generations should lead to local adaptation, while environmental variables that fluctuate within generations should have a strong influence on phenotypic plasticity

### Phenotypic plasticity

The importance of accounting for phenotypic plasticity is exemplified in our dataset by the relatively strong effect of precipitation of the driest quarter (Pd<sub>dry</sub>) on the temperature at which maximum sprint speed is achieved (T<sub>opt</sub>) and on maximum

sprint speed ( $R_{\max}$ ) itself. On their own, these strong correlations might traditionally be considered evidence for local adaptation. Our analysis, however, suggests that the environmental effect is largely unaffected by connectivity, implying that variation in these traits is due to plasticity. Other work (28) has shown little temporal variation in  $T_{\text{opt}}$  (within generations) despite clear geographic variation and this, together with our results, suggests that this trait undergoes developmental plasticity, but is fixed in adult lizards. In principle, this non-effect of connectivity could also arise due to selection that is so strong that it maintains local adaptation despite high levels of gene flow [i.e., immigrants are selected against so strongly that they do not contribute to the effective population (11)]. The environment–trait relationships for  $T_{\text{opt}}$  and  $R_{\max}$  are, however, weaker than those for some other traits (e.g.,  $CT_{\max}$  and  $CT_{\min}$ ) that show clear effects of connectivity, so extremely strong selection seems an unlikely explanation for the pattern we see here.

#### Assumptions and limitations

Our analysis requires an index of population connectivity across the landscape, something that can be calculated relatively easily for many species by using broad scale habitat mapping datasets [e.g., vegetation mapping from DERM (53)]. Where possible, these measures of connectivity should be calculated at a scale relevant to the scale of dispersal of the species in question [as was ours, using dispersal rate data for *Lampropholis coggeri* from Singhal and Moritz (54)]. For highly mobile species, such as plants or insects that have wind-assisted dispersal and for which calculating connectivity between populations may be difficult, it is possible our approach will not work. But for many species of animals with relatively low vagility (i.e., the species for which TGF is most needed), our approach should be generally applicable.

420

421 Our approach implicitly assumes that traits have a linear response to the environment  
 422 (at least at the environmental scale across which we are looking). In most instances,  
 423 this will be a reasonable assumption: it seems unlikely, for example, that a trait such  
 424 as desiccation resistance would be high in dry environments, low in moderately wet  
 425 environments, and then high again in very wet environments. The reason our  
 426 assumption of linear environment–trait relationships bears mentioning is that a  
 427 limitation of our technique arises when the connectivity index is strongly correlated  
 428 with one or more of the other environmental variables being used. In our system, for  
 429 example, AMP and Pdry are correlated with connectivity (Fig. S1). Where the  
 430 environment–connectivity correlation is very strong, the interaction term in our model  
 431 ( $\text{Conn} \times \text{Env}$ ) could be interpreted as a quadratic term for environment (i.e.,  $\text{Env}^2$ ). In  
 432 these cases, it is possible that a strong connectivity interaction is, in fact, pointing to a  
 433 non-linear environment–trait relationship. Thus, for environmental variables that  
 434 correlate with connectivity (and there will always be some), careful consideration  
 435 needs to be given to the possibility of a quadratic fitness function between  
 436 environment and trait. In our case, it remains possible, for example, that the strong  
 437 influence of precipitation on local adaptation in our system is spurious, and instead  
 438 reflects non-linear relationships between optimal trait values and precipitation. We  
 439 can, however, think of no obvious reason why thermal limits should respond  
 440 quadratically to precipitation, nor why desiccation rates and other physiological traits  
 441 should also do so. Thus we are inclined to accept the importance of this  
 442 environmental variable in driving local adaptation in our system.

443

Finally, our approach, by examining one environment–trait combination at a time, may potentially miss relationships that only appear in multivariate analyses. For example, if two environmental variables are negatively correlated but both have a positive effect on a trait, it is possible that these countergradients can obscure the univariate relationship. Similar problems are encountered when examining response to selection over time (55), and with our approach may lead us to underestimate the number of important environmental drivers of local adaptation. To minimize this effect, care should be taken in future work to sample environmental spaces in such a way as to minimize correlations between environmental variables. Such an aim can be achieved by, for example, strategically exploiting latitudinal and altitudinal gradients.

## Conclusion

There is increasing urgency to identify populations that will act as suitable sources for targeted gene flow efforts in the face of climate change. To identify these populations, we need to know which traits influence sensitivity to climate and are locally adapted. Traditional approaches to unearthing local adaptation (reciprocal transplants and common garden experiments) are time consuming, and often cannot attribute adaptation to any particular environmental driver. Local adaptation is, however, undermined by gene flow, and we should be able to use this fact to sort patterns of local adaptation from patterns with other causes. Here we have demonstrated this approach: using connectivity as a proxy for gene flow, and looking for its effect on environment–trait correlations. Our analysis, using a species of lizard from Australia’s Wet Tropics rainforest, suggests the approach has merit: the results we achieve are coherent and suggest local adaptation is the overwhelming signal in the set of environment-trait correlations tested. As well as confirming a strong role for local

adaptation, we have effectively ranked environmental drivers of local adaptation, finding evidence that precipitation and temperature are important environmental variables with regard to local adaptation. Our analysis also suggests that some traits exhibit strong plastic responses to the environment, particularly in response to precipitation of the driest quarter and the seasonality of temperature and precipitation. These specific results will likely apply to other species that are phylogenetically or ecologically similar to our focal species, but the method has the potential to apply much more broadly. Given the potential of this method to provide evidence of local adaptation, and rapid ranking of the climatic drivers of local adaptation, assessment of the method in a broader array of systems is warranted.

## Acknowledgments

This work was funded by the Tropical Landscapes Joint Venture, the Wet Tropics Management Authority, an Australian Postgraduate Award to SLM, and Australian Research Council project DP130100318. All physiological data used in these analyses were collected by Amberlee Hatcher at James Cook University. The authors are eternally grateful for her patience and attention to detail while undertaking this task.

## References

1. Reznick DN & Ghalambor CK (2001) The population ecology of contemporary adaptations: what empirical studies reveal about the conditions that promote adaptive evolution. *Genetica* 112:183-198.
2. Reznick DN, Shaw FH, Rodd FH, & Shaw RG (1997) Evaluation of the rate of evolution in natural populations of guppies (*Poecilia reticulata*). *Science* 275(5308):1934–1937.
3. Losos JB, Warheit KI, & Schoener TW (1997) Adaptive differentiation following experimental island colonization in *Anolis* lizards. *Nature* 387(6628):70–73.
4. Stuart YE, *et al.* (2014) Rapid evolution of a native species following invasion by a congener. *Science* 346(6208):463–466.
5. Richardson JL, Urban MC, Bolnick DI, & Skelly DK (2014) Microgeographic adaptation and the spatial scale of evolution. *Trends Ecol Evol* 29(3):165–176.
6. Stockwell CA, Hendry AP, & Kinnison MT (2003) Contemporary evolution meets conservation biology. *Trends Ecol. Evol.* 18(2):94-101.
7. Kelly MW, Sanford E, & Grosberg RK (2012) Limited potential for adaptation to climate change in a broadly distributed marine crustacean. *Proceedings of the Royal Society B-Biological Sciences* 279(1727):349–356.
8. Olsson M & Uller T (2003) Thermal environment, survival and local adaptation in the common frog, *Rana temporaria*. *Evol Ecol Res* 5(3):431–437.
9. Sinervo B, *et al.* (2010) Erosion of Lizard Diversity by Climate Change and Altered Thermal Niches. *Science* 328(5980):894–899.

- 510 10. Hoffmann AA & Sgrò CM (2011) Climate change and evolutionary  
511 adaptation. *Nature* 470(7335):479–485.
- 512 11. Kawecki TJ & Ebert D (2004) Conceptual issues in local adaptation. *Ecol Lett*  
513 7(12):1225–1241.
- 514 12. Reznick DN & Travis J (1996) The empirical study of adaptation in natural  
515 populations. *Adaptation*, (Academic Press, San Diego, CA), pp 243–289.
- 516 13. Blanquart F, Kaltz O, Nuismer SL, & Gandon S (2013) A practical guide to  
517 measuring local adaptation. *Ecology Letters* 16:1195–1205.
- 518 14. Wright JW, Stanton ML, & Scherson R (2006) Local adaptation to serpentine  
519 and non-serpentine soils in *Collinsia sparsiflora*. *Evol Ecol Res* 8(1):1–21.
- 520 15. García-Ramos G & Kirkpatrick M (1997) Genetic models of adaptation and  
521 gene flow in peripheral populations. *Evolution* 51(1):21–28.
- 522 16. Wright S (1931) Evolution in Mendelian populations. *Genetics* 16(2):0097–  
523 0159.
- 524 17. Dhondt AA, Adriaensen F, Matthysen E, & Kempenaers B (1990)  
525 Nonadaptive Clutch Sizes in Tits. *Nature* 348(6303):723–725.
- 526 18. Storfer A, Cross J, Rush V, & Caruso J (1999) Adaptive coloration and gene  
527 flow as a constraint to local adaptation in the streamside salamander,  
528 *Ambystoma barbouri*. *Evolution* 53(3):889–898.
- 529 19. Sandoval CP (1994) The Effects of the Relative Geographic Scales of Gene  
530 Flow and Selection on Morph Frequencies in the Walking-Stick *Timema*  
531 *christinae*. *Evolution* 48(6):1866–1879.
- 532 20. Seebacher F, White CR, & Franklin CE (2015) Physiological plasticity  
533 increases resilience of ectothermic animals to climate change. *Nature Climate*  
534 *Change* 5(1):61–66.

- 535 21. IPCC (2014) *Climate Change 2014: Synthesis Report. Contribution of*  
536 *Working Groups I, II and III to the Fifth Assessment Report of the*  
537 *Intergovernmental Panel on Climate Change* (IPCC, Geneva, Switzerland) p  
538 151.
- 539 22. Meehl GA, *et al.* (2007) Global Climate Projections. in *Climate Change 2007:*  
540 *The Physical Science Basis. Contribution of Working Group I to the Fourth*  
541 *Assessment Report of the Intergovernmental Panel on Climate Change*, eds  
542 Solomon S, Qin D, Manning M, Chen Z, Marquis M, Averyt KB, Tignor M,  
543 & Miller HL (Cambridge University Press, Cambridge, United Kingdom and  
544 New York, NY, USA).
- 545 23. Aitken SN & Whitlock MC (2013) Assisted gene flow to facilitate local  
546 adaptation to climate change. *Annu Rev Ecol Evol Syst* 44:367–388.
- 547 24. Williams SE, Shoo LP, Isaac JL, Hoffmann AA, & Langham G (2008)  
548 Towards an integrated framework for assessing the vulnerability of species to  
549 climate change. *PLoS Biol* 6(12):2621–2626.
- 550 25. Weeks AR, *et al.* (2011) Assessing the benefits and risks of translocations in  
551 changing environments: a genetic perspective. *Evolutionary Applications*  
552 4(6):709–725.
- 553 26. Kelly EL & Phillips BL (2016) Targeted gene flow for conservation. *Cons.*  
554 *Biol.* 30:259-267.
- 555 27. Wilson SK & Swan G (2010) *A complete guide to reptiles of Australia* (Reed  
556 New Holland, Sydney, N.S.W.) p 512 pp.
- 557 28. Llewelyn J, Macdonald S, Hatcher A, Moritz C, & Phillips BL (2016)  
558 Intraspecific variation in climate-relevant traits in a tropical rainforest skink.  
559 *Diversity and Distributions* 22(10):1000-1012.



- 560 29. Phillips BL, Llewelyn J, Hatcher A, Macdonald S, & Moritz C (2014) Do  
561 evolutionary constraints on thermal performance manifest at different  
562 organizational scales? *J. Evol. Biol.* 27:2687-2694.
- 563 30. Easterling DR, *et al.* (2000) Climate extremes: Observations, modeling, and  
564 impacts. *Science* 289(5487):2068-2074.
- 565 31. Parmesan C, Root TL, & Willig MR (2000) Impacts of extreme weather and  
566 climate on terrestrial biota. *B Am Meteorol Soc* 81(3):443–450.
- 567 32. R Core Team (2015) R: A Language and Environment for Statistical  
568 Computing (R Foundation for Statistical Computing, Vienna, Austria).
- 569 33. Llewelyn J, Macdonald SL, Hatcher A, Moritz C, & Phillips BL (submitted)  
570 Intraspecific variation in climate-relevant traits in a tropical rainforest skink.
- 571 34. Wegener JE, Gartner GEA, & Losos JB (2014) Lizard scales in an adaptive  
572 radiation: variation in scale number follows climatic and structural habitat  
573 diversity in *Anolis* lizards. *Biol J Linn Soc* 113(2):570–579.
- 574 35. Klaczko J, Ingram T, & Losos J (2015) Genitals evolve faster than other traits  
575 in *Anolis* lizards. *Journal of Zoology* 295(1):44–48.
- 576 36. Bogert CM (1949) Thermoregulation in Reptiles, a Factor in Evolution.  
577 *Evolution* 3(3):195–211.
- 578 37. Hoffmann AA (2010) Physiological climatic limits in *Drosophila*: patterns  
579 and implications. *J Exp Biol* 213(6):870–880.
- 580 38. Clusella-Trullas S, Blackburn TM, & Chown SL (2011) Climatic Predictors of  
581 Temperature Performance Curve Parameters in Ectotherms Imply Complex  
582 Responses to Climate Change. *Am Nat* 177(6):738–751.

- 583 39. Angilletta MJ (2009) *Thermal adaptation: a theoretical and empirical*  
584 *synthesis* (Oxford University Press, Oxford; New York) pp xii, 289 p. 281 col.  
585 plate.
- 586 40. Goodman BA, Miles DB, & Schwarzkopf L (2008) Life on the Rocks: Habitat  
587 Use Drives Morphological and Performance Evolution in Lizards. *Ecology*  
588 89(12):3462–3471.
- 589 41. Huey RB & Webster TP (1976) Thermal Biology of *Anolis* Lizards in a  
590 Complex Fauna: the *cristatellus* Group on Puerto-Rico. *Ecology* 57(5):985–  
591 994.
- 592 42. Crowley SR (1987) The Effect of Desiccation Upon the Preferred Body-  
593 Temperature and Activity Level of the Lizard *Sceloporus undulatus*. *Copeia*  
594 (1):25–32.
- 595 43. Jones SM, Waldschmidt SR, & Potvin MA (1987) An Experimental  
596 Manipulation of Food and Water - Growth and Time-Space Utilization of  
597 Hatchling Lizards (*Sceloporus undulatus*). *Oecologia* 73(1):53–59.
- 598 44. Lorenzon P, Clobert J, Oppliger A, & John-Alder H (1999) Effect of water  
599 constraint on growth rate, activity and body temperature of yearling common  
600 lizard (*Lacerta vivipara*). *Oecologia* 118(4):423–430.
- 601 45. Stamps J & Tanaka S (1981) The Influence of Food and Water on Growth-  
602 Rates in a Tropical Lizard (*Anolis aeneus*). *Ecology* 62(1):33–40.
- 603 46. Myers VI & Heilman MD (1969) Thermal Infrared for Soil Temperature  
604 Studies. *Photogramm Eng* 35(10):1024–1032.
- 605 47. Martin TL & Huey RB (2008) Why "Suboptimal" is optimal: Jensen's  
606 inequality and ectotherm thermal preferences. *Am Nat* 171(3):E102–E118.

- 607 48. Bonebrake TC & Mastrandrea MD (2010) Tolerance adaptation and  
608 precipitation changes complicate latitudinal patterns of climate change  
609 impacts. *Proc Natl Acad Sci U S A* 107(28):12581–12586.
- 610 49. Kingsolver JG & Huey RB (1998) Evolutionary analyses of morphological  
611 and physiological plasticity in thermally variable environments. *Am Zool*  
612 38(3):545–560.
- 613 50. Gilchrist GW (1995) Specialists and Generalists in Changing Environments. I.  
614 Fitness Landscapes of Thermal Sensitivity. *Am Nat* 146(2):252–270.
- 615 51. Phillips BL, *et al.* (2016) Heat hardening in a tropical lizard: geographic  
616 variation explained by the predictability and variance in environmental  
617 temperatures. *Func. Ecol.* 30:1161-1168.
- 618 52. Polechová J, Barton N, & Marion G (2009) Species' range: adaptation in space  
619 and time. *Am Nat* 174(5):E186–E204.
- 620 53. DERM (2011) Queensland Department of Environment and Resource  
621 Management, regional ecosystem mapping version 7.0.
- 622 54. Singhal S & Moritz C (2012) Strong selection against hybrids maintains a  
623 narrow contact zone between morphologically cryptic lineages in a rainforest  
624 lizard. *Evolution* 66(5):1474–1489.
- 625 55. Merila J, Sheldon BC, & Kruuk LEB (2001) Explaining stasis:  
626 microevolutionary studies in natural populations. *Genetica* 112:199-222.
- 627 56. Jones, D.A., Wang, W. & Fawcett, R. (2009) High-quality spatial climate  
628 data-sets for Australia. *Australian Meteorological and Oceanographic*  
629 *Journal*, 58, 233–248.

630 57. McMahon, J.P., Hutchinson, M.F., Nix, H.A. & Ord, K.D. (1995). *ANUCLIM*  
631 *user's guide*. Centre for Resource and environmental Studies, Australian  
632 National University, Canberra.

633 58. Storlie, C.J., Phillips, B.L., VanDerWal, J.J. & Williams, S.E. (2013)  
634 Improved spatial estimates of climate predict patchier species distributions.  
635 *Diversity and Distributions*, **19**, 1106–1113.

636 59. Graham, Catherine H., VanDerWal, Jeremy, Phillips, Steven J., Moritz, Craig,  
637 and Williams, Stephen E. (2010). Dynamic refugia and species persistence:  
638 tracking spatial shifts in habitat through time. *Ecography*, 33(6):1062-1069.  
639  
640  
641

## Figure Captions

**Figure 1.** Graphs showing the concepts illustrated by plotting a set of environment–trait coefficients (x-axis) and the corresponding environment–connectivity interaction coefficients (y-axis). A) Phenotypic plasticity is suggested when environment–trait relationships are strong, but are not influenced by connectivity. B) Local adaptation is suggested when increasing connectivity diminishes the correlation between the environment and the trait. C) The effect of the environment is enhanced by connectivity. This latter pattern might arise in organisms that are highly mobile and can actively move to their ideal environment, thus avoiding the selective pressures that would lead to local adaptation.

**Figure 2.** Map of the southern Australian Wet Tropics bioregion, showing the distribution of rainforest and the sampling locations.

**Figure 3.** Scatterplot showing the results of 99 linear models run to assess the relationship between each pair of environment–trait variables and the environment–connectivity interaction. Environment–trait coefficients are on the x-axis, and environment–connectivity interaction coefficients are on the y-axis. Local adaptation is suggested in environment–trait pairs that show a strong environmental effect that is eroded by increasing connectivity.

**Figure 4.** Heatmap showing the relative rankings of climate variables (rows) and morphological and physiological traits (columns). The matrix has been sorted (by reciprocal averaging) and coloured according to the strength of local adaptation, with higher values coloured red and being sorted to the top/left. See Tables S1 and S2 for explanations of the trait and environmental variables used.

$L$  = local adaptation index:  $-B_{env} B_{int}$

$B_{env}$  = coefficient of the environmental variable.

$B_{int}$  = coefficient of the interaction between the environment and connectivity terms.

## 674 Figures

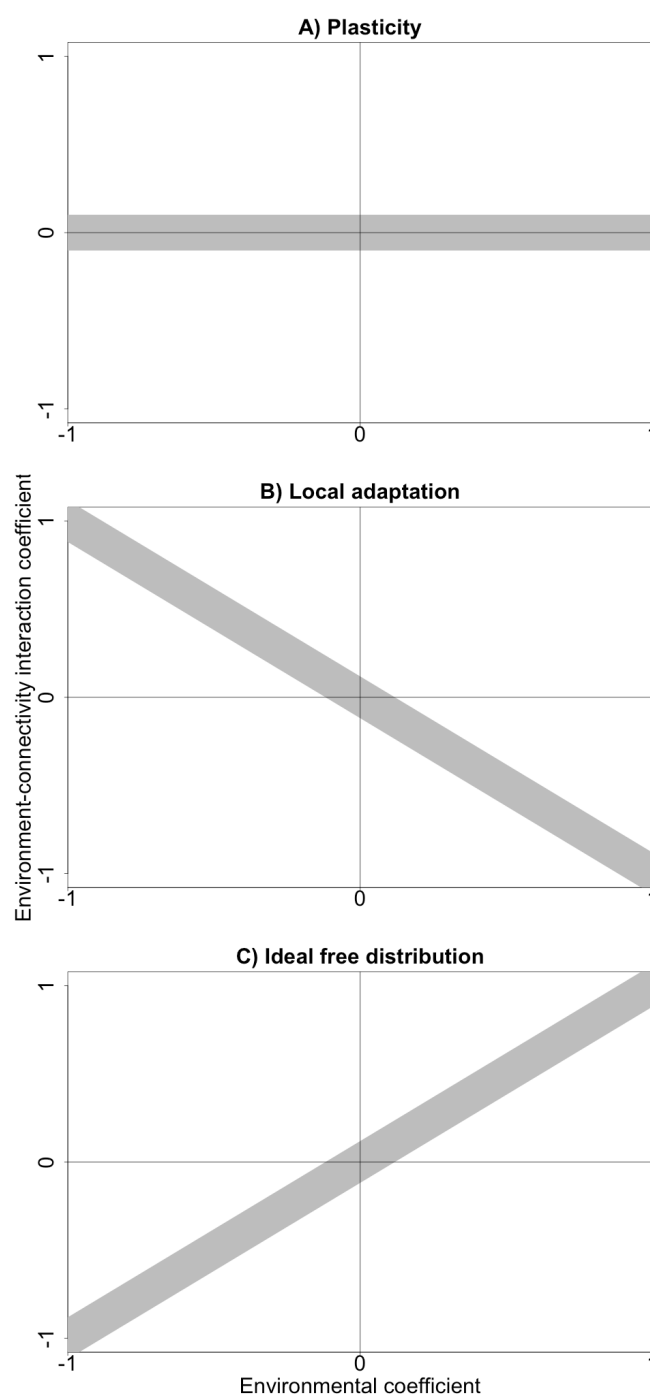

675  
676 **Figure 1**  
677

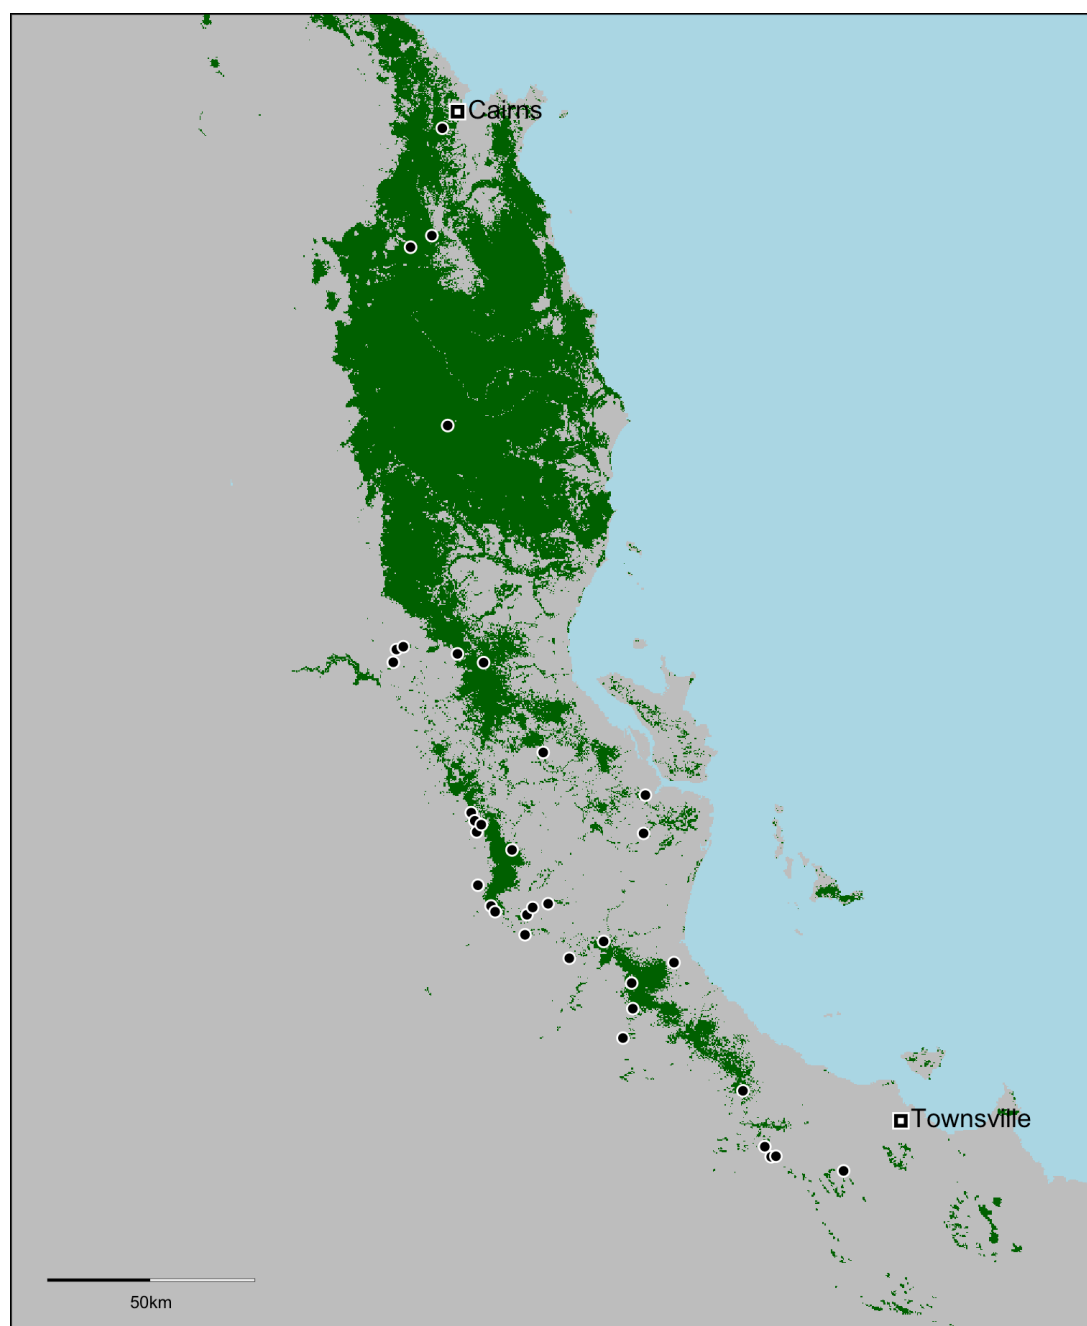

**Figure 2**

682

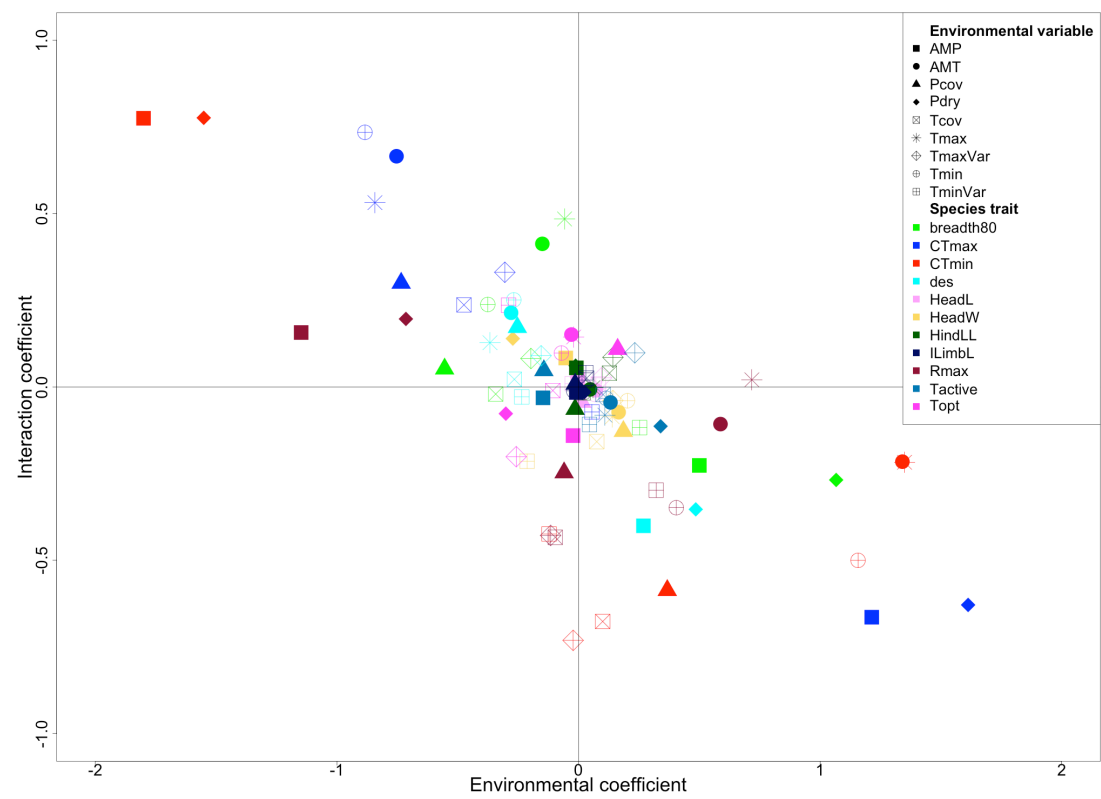

683

684

685

686

**Figure 3**



|         | CTmin       | CTmax       | breadth80   | Rmax        | des         | HeadW       | Tactive     | HindLL      | HeadL       | ILimL       | Topt        |
|---------|-------------|-------------|-------------|-------------|-------------|-------------|-------------|-------------|-------------|-------------|-------------|
| AMP     | L = 0.7751  | L = -0.6644 | L = -0.2265 | L = 0.1570  | L = -0.4007 | L = 0.0835  | L = -0.0315 | L = 0.0551  | L = 0.0219  | L = -0.0159 | L = -0.1404 |
| Pdry    | L = 0.7763  | L = -0.6289 | L = -0.2683 | L = 0.1961  | L = -0.3532 | L = 0.1395  | L = -0.1134 | L = 0.0613  | L = 0.0279  | L = -0.0150 | L = -0.0771 |
| Tmin    | L = -0.5004 | L = 0.7345  | L = 0.2380  | L = -0.3484 | L = 0.2510  | L = -0.0399 | L = -0.0329 | L = -0.0157 | L = -0.0219 | L = -0.0116 | L = 0.0977  |
| AMT     | L = -0.2156 | L = 0.6655  | L = 0.4128  | L = -0.1072 | L = 0.2139  | L = -0.0730 | L = -0.0447 | L = -0.0071 | L = -0.0099 | L = -0.0043 | L = 0.1511  |
| Tmax    | L = -0.2173 | L = 0.5316  | L = 0.4846  | L = 0.0206  | L = 0.1275  | L = -0.0864 | L = -0.0813 | L = -0.0020 | L = -0.0041 | L = 0.0002  | L = 0.1438  |
| Pcov    | L = -0.5868 | L = 0.2996  | L = 0.0522  | L = -0.2473 | L = 0.1719  | L = -0.1279 | L = 0.0474  | L = -0.0642 | L = -0.0440 | L = 0.0082  | L = 0.1089  |
| Tcov    | L = -0.6766 | L = 0.2366  | L = -0.0206 | L = -0.4338 | L = 0.0219  | L = -0.1579 | L = -0.0219 | L = 0.0397  | L = 0.0083  | L = 0.0253  | L = -0.0104 |
| TmaxVar | L = -0.7312 | L = 0.3308  | L = 0.0820  | L = -0.4284 | L = 0.0898  | L = -0.0394 | L = 0.0984  | L = 0.0853  | L = 0.0267  | L = 0.0034  | L = -0.2013 |
| TminVar | L = -0.4241 | L = -0.0721 | L = -0.1174 | L = -0.2979 | L = -0.0289 | L = -0.2144 | L = -0.1083 | L = -0.0172 | L = 0.0095  | L = 0.0409  | L = 0.2357  |

**Figure 4**
